1 BK polyomavirus (BKPyV) is a risk factor for bladder cancer through  
2 induction of APOBEC3-mediated genomic damage

3 Simon C. Baker<sup>1,\*</sup>, Andrew S. Mason<sup>1</sup>, Raphael G. Slip<sup>1</sup>, Katie T. Skinner<sup>1</sup>, Andrew Macdonald<sup>2</sup>,  
4 Omar Masood<sup>3</sup>, Reuben S. Harris<sup>4</sup>, Tim R. Fenton<sup>5</sup>, Manikandan Periyasamy<sup>6</sup>, Simak Ali<sup>6</sup> &  
5 Jennifer Southgate<sup>1</sup>

6

7 <sup>1</sup>Jack Birch Unit for Molecular Carcinogenesis, Department of Biology and York Biomedical  
8 Research Institute, University of York, Heslington, York YO10 5DD, UK.

9 <sup>2</sup>Faculty of Biological Sciences, School of Molecular and Cellular Pathology, University of  
10 Leeds, Leeds, UK.

11 <sup>3</sup>St James's University Hospital, Leeds, UK.

12 <sup>4</sup>College of Biological Sciences, University of Minnesota, Minneapolis, MN 55455, USA.

13 <sup>5</sup>School of Biosciences, University of Kent, Canterbury, CT2 7NJ, UK.

14 <sup>6</sup>Department of Surgery & Cancer, Faculty of Medicine, Imperial College London, UK.

15

16 Contact Information for Corresponding Author\* (Address as above)

17 Tel: +44 1904 328706

18 Fax +44 1904 328704

19 E-mail address: [simon.baker@york.ac.uk](mailto:simon.baker@york.ac.uk)

20

21 Keywords: APOBEC3A, APOBEC3B, urothelium, urothelial, carcinogenesis

22 **Abstract**

23 Limited understanding of bladder cancer aetiopathology hampers progress in reducing incidence. BK  
24 polyomavirus (BKPyV) is a common childhood infection that can be reactivated in the adult kidney  
25 leading to viruria. Here we used a mitotically-quiescent, differentiated, normal human urothelial *in*  
26 *vitro* model to study BKPyV infection. BKPyV infection led to significantly elevated APOBEC3A and  
27 APOBEC3B protein, increased deaminase activity and greater numbers of apurinic/aprimidinic sites  
28 in the host urothelial genome. BKPyV Large T antigen (LT-Ag) stimulated re-entry into the cell cycle via  
29 inhibition of Retinoblastoma protein and activation of EZH2, E2F1 and FOXM1, which combined to  
30 push urothelial cells from G0 into an arrested G2 cell cycle state. The single-stranded DNA  
31 displacement loops formed during BKPyV-infection, provide a substrate for APOBEC3 enzymes where  
32 they interacted with LT-Ag. These results support reactivated BKPyV infections in adults as a risk factor  
33 for bladder cancer in immune-insufficient populations, including transplant patients and the elderly.

## 34 Introduction

35 Urothelial (bladder) cancer has a complex natural history with an indolent, frequently recurrent and  
36 unpredictably progressive disease path, which converges with a more aggressive route taken by  
37 malignancies that can present at advanced muscle-invasive and even disseminated stages. Although  
38 smoking is a well-established risk factor for bladder cancer (BLCA), the mutational signatures of  
39 bladder tumours show only a minor proportion of the G>T transversions characteristic of DNA damage  
40 caused directly by smoke-derived carcinogens<sup>1</sup>. Polyomavirus (PyV) infection could provide an  
41 alternative route to initiation of particular relevance to immune-insufficient populations.

42 PyV are ubiquitous childhood infections, with 70-80% seroprevalence by adulthood<sup>2</sup>. They are largely  
43 asymptomatic in the immuno-competent, but may remain latent in the adult kidney<sup>3</sup>. BK polyomavirus  
44 (BKPyV) resides latent in differentiated renal proximal tubule cells and reactivation at times of  
45 immune-insufficiency leads to sloughing of actively infected “decoy” cells (into the urine), to limit  
46 kidney damage<sup>4</sup>. PyV DNA can be detected in the urine of immuno-competent individuals with a  
47 frequency that increases with age (to ≥30% in the over 50s for BKPyV)<sup>5</sup>. The only published study of  
48 BLCA risk (n=3,782), found a higher incidence (15.8%) in the 133 patients with previous urine cytology  
49 evidence of BKPyV infection (OR3.4, p < 0.001)<sup>6</sup>.

50 Studies of bladder tumour genomes have identified mutational signatures associated with the anti-  
51 viral apolipoprotein B mRNA editing enzyme catalytic polypeptide (APOBEC) family of cytosine  
52 deaminase enzymes in up to 93% of cases<sup>7</sup>. The large T antigen (LT-Ag) of BKPyV has been shown to  
53 induce APOBEC3B expression<sup>8,9</sup>. However, studies of bladder tumours fail to identify viral DNA or RNA,  
54 with fewer than 4% positives reported in the largest study of 689 cases<sup>10</sup>. A successful PyV life-cycle  
55 requires the viral genome to remain episomal (*i.e.* non-integrated). The hypothesis of this study is that  
56 the episomal life-cycle of BKPyV in the urothelium is capable of initiating bladder tumours via APOBEC-  
57 mediated damage of the host genome. This is a so-called “hit-and-run” mode of carcinogenesis  
58 whereby the presence of virus causes the initiating inactivation mutation of tumour suppressor genes  
59 decades before a tumour forms. Subsequent immune clearance of BKPyV leads to its absence from  
60 later stages of tumour development (summarised Fig. 1).

61 Due to the asymptomatic nature of BKPyV infection, clinical sampling during reactivated adult  
62 infection is challenging and since BKPyV is human-specific, *in vivo* models are not applicable. This study  
63 was designed to evaluate hit-and-run carcinogenic mechanisms for BKPyV-infection of the normal  
64 human urothelium *in vitro*. Human urothelium is a low-turnover mitotically-quiescent epithelium  
65 where cells reside in G0<sup>11</sup>. To address limitations in previous urothelial studies which have employed  
66 actively-dividing, undifferentiated cell cultures<sup>12-14</sup>; this study applied a unique, quiescent (G0-

67 arrested), stratified and barrier-forming *in vitro* model of normal human urothelium that uses  
68 biological replicates to reflect donor diversity<sup>15</sup>. Interferon- $\gamma$  (IFN $\gamma$ ) has previously been clinically  
69 associated with BKPyV infection<sup>16</sup> and suggested to reduce BKPyV-infection progression in renal cell  
70 cultures<sup>17</sup>; therefore we investigated its potential for regulating urothelial anti-viral self-defence  
71 mechanisms.

72

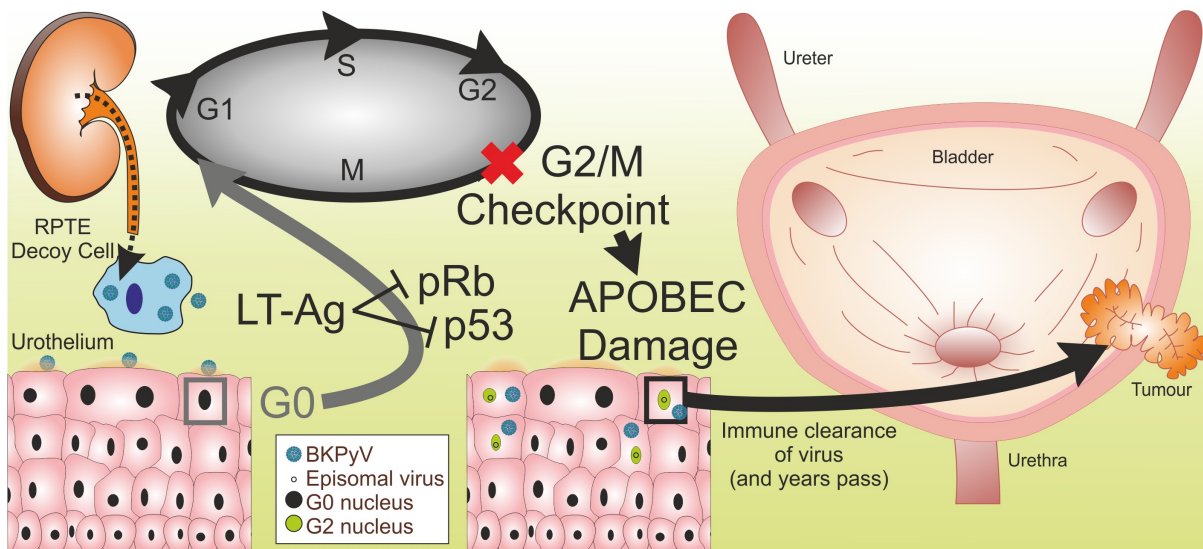

74 *Fig. 1 – Schematic model of BKPyV hit-and-run carcinogenesis hypothesis. Immune-insufficiency leads*  
75 *to sloughing of actively infected renal “decoy” cells and BKPyV viruria. BKPyV infects the G0-arrested*  
76 *urothelium. BKPyV LT-Ag inhibits retinoblastoma (pRb) and p53 inhibition of the cell cycle. BKPyV cell*  
77 *cycle re-entry progresses to arrest at the G2/M checkpoint. BKPyV stimulates APOBEC3 enzyme activity*  
78 *and host genome damage that inactivates tumour suppressors. The immune system clears the virus*  
79 *but initiated cells persist and over a period of years expand to form a tumour.*

## 80 Results

### 81 *BKPyV Infection of normal human urothelium*

82 Initial studies found BKPyV infection of mitotically-quiescent urothelium to be more successful in  
83 differentiated than undifferentiated cultures (Extended Data Fig. 1). For this study, BKPyV infection  
84 was evaluated during the pre-lytic phase of infection in differentiated normal human urothelial (NHU)  
85 cell cultures which showed no morphological or transcriptomic signs of apoptosis during the 14 day  
86 infection period (Extended Data Fig. 2).

87 This is the first transcriptomic study of BKPyV infection of normal human urothelial tissues, which  
88 reflect human diversity in utilising cultures from multiple different donors (n=7 for mRNAseq). All  
89 genes of the BKPyV genome were expressed at 14dpi, with *Agnoprotein* the most (mean relative  
90 TPM=157,998) and *LT-Ag* the least (mean relative TPM=699) expressed transcripts (Fig. 2A with  
91 genome map as Fig. 2B). Overall, the expression pattern is indicative of greater activity at the late  
92 promoter driving *Agnoprotein*, *VP1* and *VP2* gene expression (Fig. 2A). In some cultures, IFN $\gamma$  was  
93 added for the 7-14dpi period and the cytokine significantly reduced expression of all viral genes to an  
94 average of 44% of that observed in the absence of IFN $\gamma$  (Fig. 2A). However, the ability of human  
95 urothelium to frustrate BKPyV gene expression in the presence of IFN $\gamma$  was highly variable between  
96 donors, with the IFN $\gamma$ -induced reduction in expression ranging from 1.8% to 66.2% in donors 5 and 3  
97 respectively (Fig. 2A).

98 RT-qPCR was employed to evaluate *LT-Ag* and *VP1* transcript expression during the development of  
99 infection from 7-14dpi (Fig. 2C). In all infected cultures, viral gene expression increased from 7dpi to  
100 14dpi (Fig. 2C). In cultures from donors 1&2, the addition of IFN $\gamma$  at 7dpi reduced the *LT-Ag* and *VP1*  
101 transcript burden by 14dpi, whereas in the remaining three donors tested, the increase in *LT-Ag* and  
102 *VP1* transcripts was merely attenuated (Fig. 2C).

103 Western blotting for viral proteins LT-Ag (including detection of Truncated LT-Ag “truncT-Ag”<sup>18</sup>;  
104 Extended Data Fig. 3) and VP1 found both were significantly ( $p<0.05$ ) reduced by addition of IFN $\gamma$  (Fig.  
105 2D&E). Indirect immunofluorescence labelling of LT-Ag showed that the addition of IFN $\gamma$  led to  
106 significantly fewer infected cells being detected in cultures at 14dpi (Fig. 2F&G).

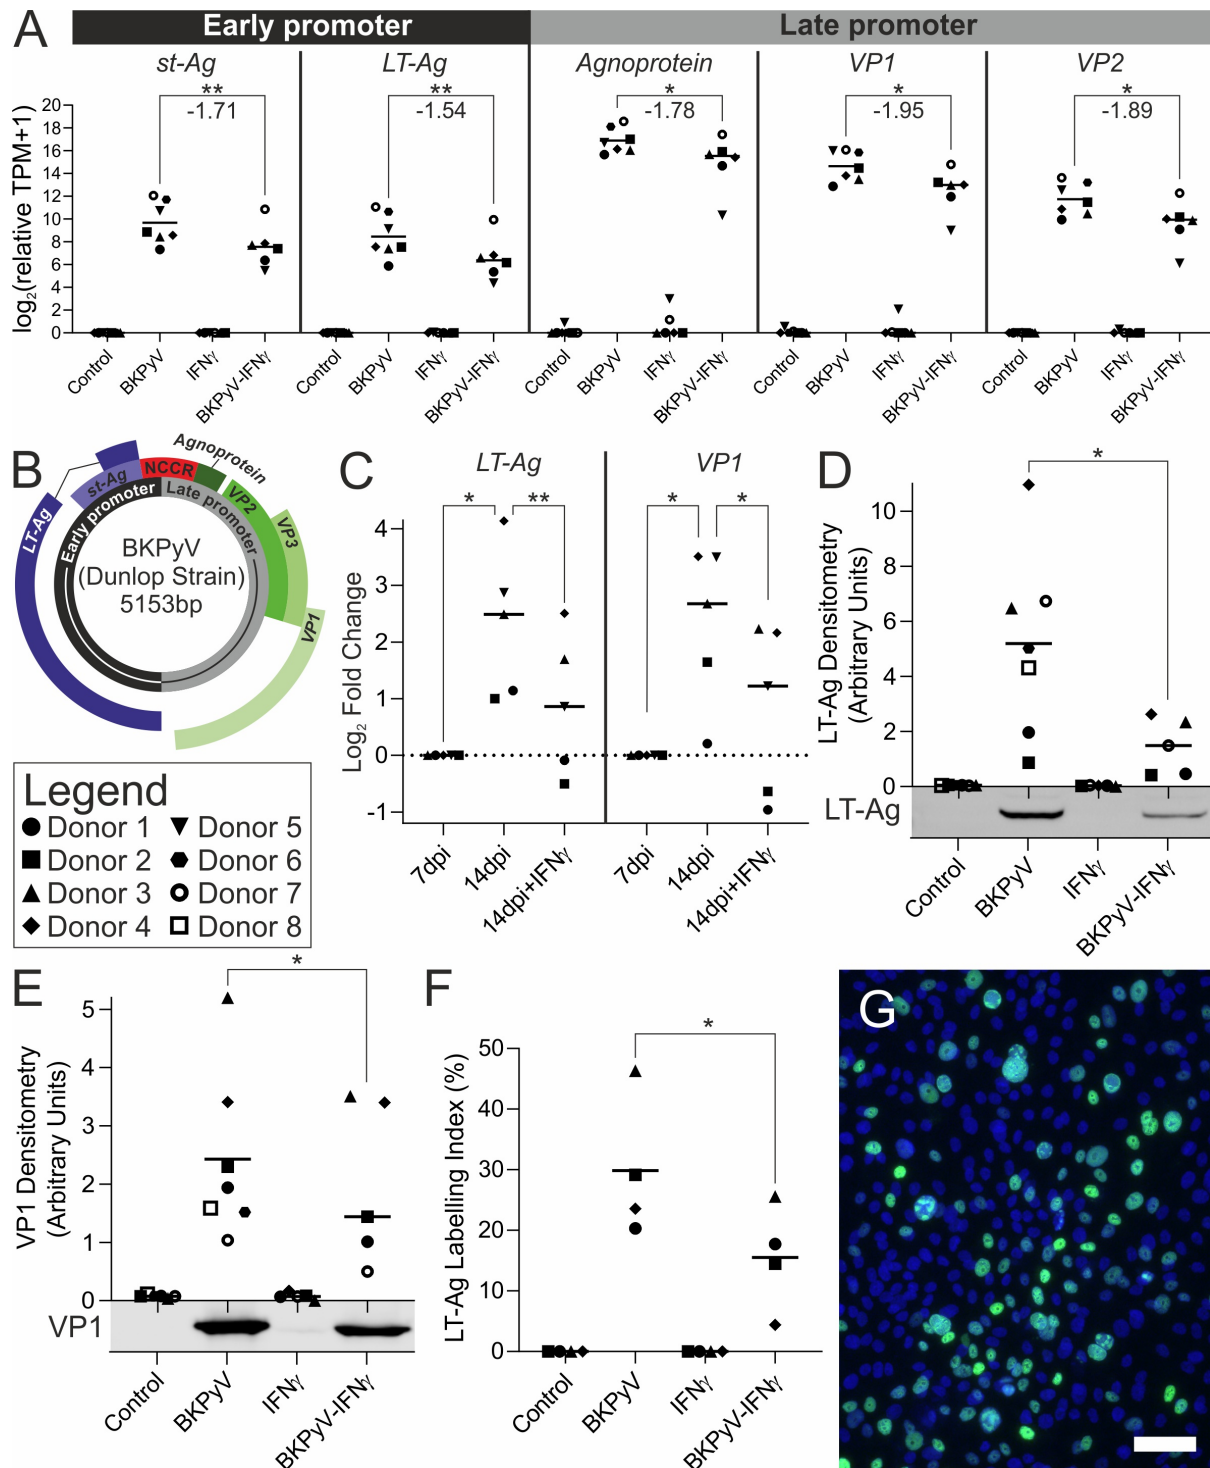

107

108 Fig. 2 – (A) mRNAseq analysis of BKPyV gene expression at 14dpi shows Agnoprotein was the most  
 109 expressed viral gene and LT-Ag the least expressed. All viral gene expression was significantly  
 110 suppressed by IFN<sub>γ</sub>; however, the efficacy was widely variable between donors. Statistically significant  
 111 comparisons are indicated by stars with the mean log<sub>2</sub> fold change in gene expression reported  
 112 beneath (n=6/7 independent donors). (B) BKPyV genome map showing the non-coding control region  
 113 (NCCR) which regulates both the early and late genes that are expressed in opposing orientations. (C)  
 114 RT-qPCR analysis of BKPyV LT-Ag and VP1 transcript abundance in NHU cell cultures. Data is displayed

115 as log<sub>2</sub> fold-change normalised to abundance at 7 days post infection (dpi). VP1 abundance increased  
116 significantly between 7 and 14dpi. The addition of IFN $\gamma$  significantly reduced VP1 abundance at 14dpi.  
117 (D) 14dpi Western blot densitometry for large T antigen (LT-Ag) with exemplar blot image below the  
118 X-axis. Truncated LT-Ag (truncT-Ag) was also expressed; densitometry analysis of truncT-Ag and whole  
119 blots for LT-Ag can be found in Extended Data Fig. 3 along with the  $\beta$ -actin loading controls for all blots  
120 in Extended Data Fig. 4. (E) 14dpi Western blot densitometry for viral capsid protein 1 (VP1) with  
121 exemplar blot image below x-axis. Full blots are shown as Extended Data Fig. 5 (n=5 independent  
122 donors). (F) LT-Ag indirect immunofluorescence labelling index. n>2900 cells per condition per donor.  
123 (G) Exemplar LT-Ag indirect immunofluorescence image from Donor 3 BKPyV-infected urothelial cells  
124 (Scale bar denotes 10  $\mu$ m). Significance was assessed in panels A by LRT test and B-E by paired t-test.

125

126 Analysis of the human urothelial transcriptome at 14dpi with BKPyV by mRNAseq found 305  
127 transcripts were  $q < 0.05$  significantly >2-fold induced (Fig. 3A). The major task of any PyV infection of  
128 the urinary tract is the initiation of proliferation, since the target epithelia (namely proximal tubule  
129 and urothelium) are not actively dividing tissues and both are predominantly (>99%) out-of-cycle,  
130 arrested in G<sub>0</sub>. Gene set enrichment analysis (GSEA; Extended Data Table 1) suggested transcriptional  
131 programmes related to cell cycle re-entry (specifically the G<sub>2</sub>/M checkpoint) and DNA damage repair  
132 were activated in the mitotically quiescent urothelial cells (Extended Data Fig. 6A&B). A small number  
133 of genes were significantly reduced; these included the uroplakin genes *UPK1A*, *UPK2* and *UPK3A*,  
134 suggesting superficial urothelial differentiation was affected by BKPyV infection (Fig. 3A). Analysis of  
135 the BKPyV-induced urothelial transcriptome showed IFN $\gamma$  significantly suppressed expression of the  
136 305 infection-induced genes ( $t = -17.57$ ;  $p = 1.97 \times 10^{-47}$ ; Fig. 3B).

137 Re-entry into the cell cycle was supported by significant ( $q < 0.001$ ) *MCM2* and *MKI67* transcript  
138 induction (mean log<sub>2</sub> fold change = 5.69 and 2.11, respectively; Extended Data Fig. 6C&D). IFN $\gamma$   
139 exposure reduced mean *MCM2* and *MKI67* transcript expression in BKPyV-infected cultures compared  
140 with infection alone but, due to the variance in the IFN $\gamma$ -response, these changes were not statistically  
141 significant (Extended Data Fig. 6C&D). At the protein level MCM2 was significantly induced by BKPyV  
142 infection ( $p < 0.001$ ) and that increase was significantly suppressed by IFN $\gamma$  ( $p < 0.01$ ; Fig. 3C & Extended  
143 Data Fig. 7). Cell cycle stage analysis of Ki67 immunolocalisation<sup>19</sup> showed both a significant ( $p = 0.03$ )  
144 increase in the number of positive cells within BKPyV infected cultures and that Ki67-positive cells  
145 were overwhelmingly in the G<sub>2</sub> stage of the cell cycle, as identified by the few large nucleolar granules  
146 observed in each nucleus (Fig. 3D and E, respectively; Extended Data Fig. 8). G<sub>2</sub> arrest in BKPyV  
147 infected cultures was supported transcriptomically by significant enrichment of gene sets associated

148 with negative regulation of the G2 to M transition and experimentally-induced G2-arrest by 2-  
149 methoxyestradiol (Extended Data Fig. 6E&F). Furthermore, analysis of nuclei in cells from BKPyV-  
150 infected cultures indicated a significant increase in nuclear size for LT-Ag labelled cells, supporting cell  
151 cycle progression beyond S-phase (Extended Data Fig. 9). Indirect immunofluorescence co-labelling of  
152 MCM2 and the LT-Ag revealed that BKPyV triggered a significant increase in MCM2 positive cells and  
153 that significantly fewer cells became MCM2 positive in the presence of IFN $\gamma$  (Extended Data Fig. 10).  
154 Using LT-Ag labelling to differentiate positive from negative cells in infected cultures indicated that  
155 MCM2 was also elevated 5.6-fold ( $\pm 4.0$ ) in LT-Ag negative cells within BKPyV-exposed cultures (Fig.  
156 3F).



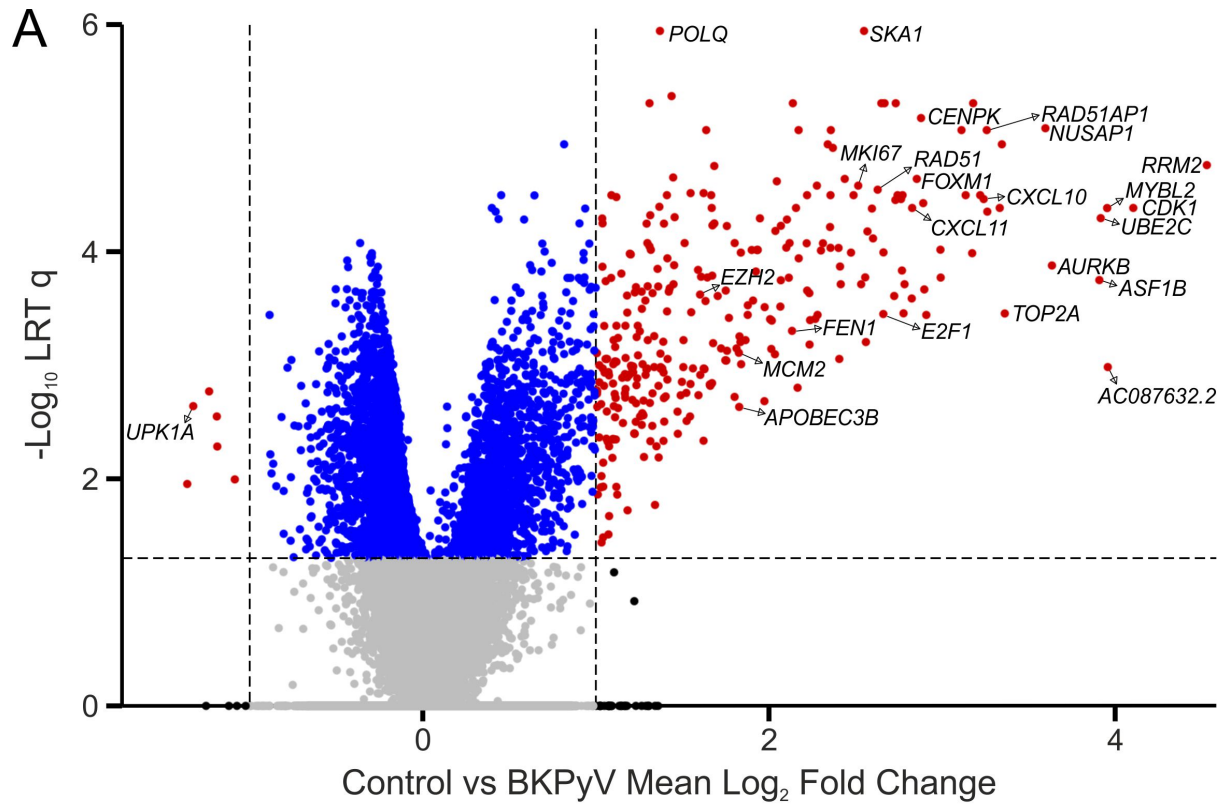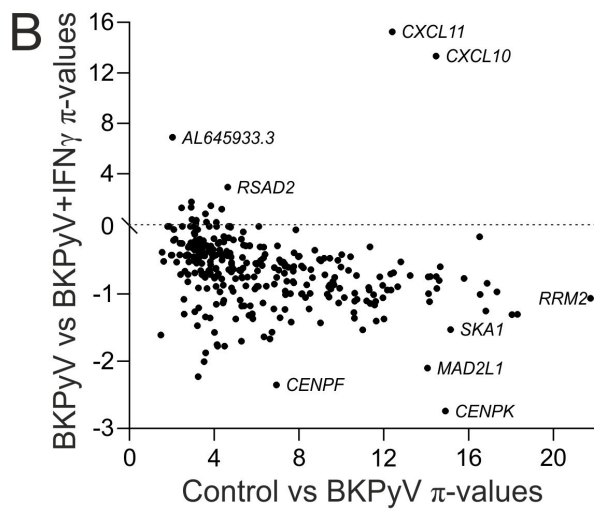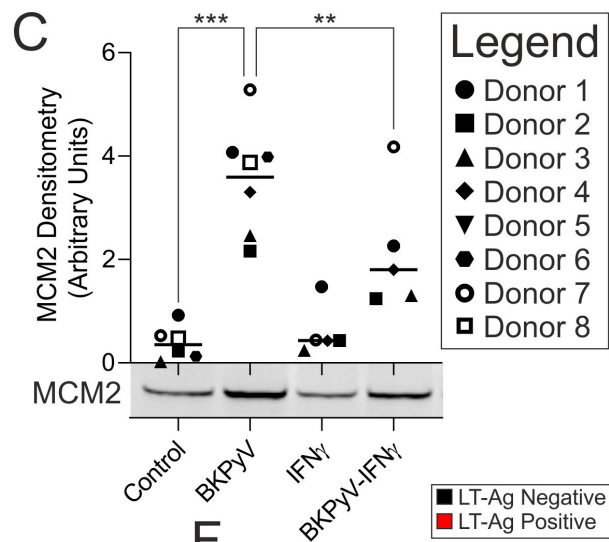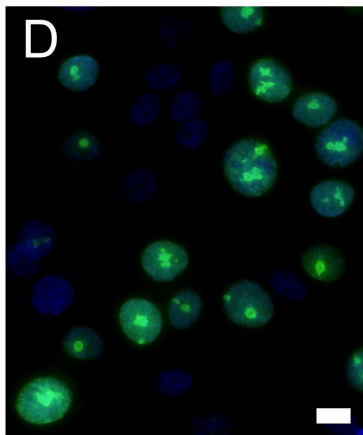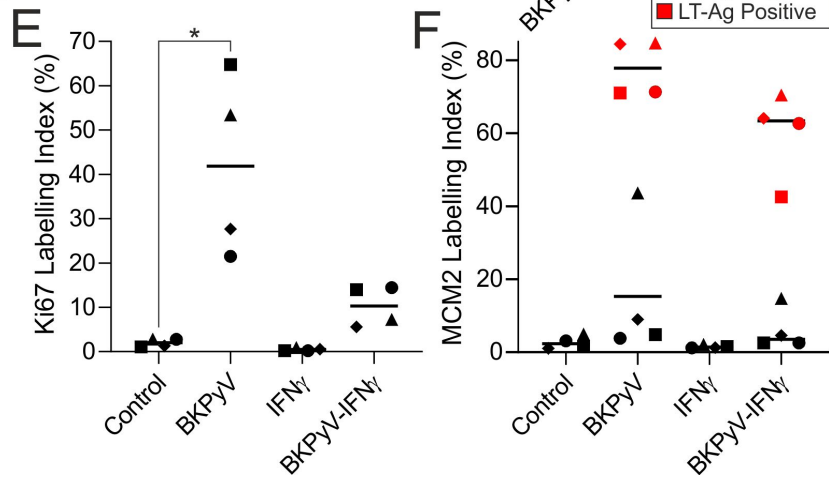

157

158 *Fig. 3 – mRNAseq analysis of BKPyV infection of differentiated human urothelium. (A) Volcano plot*  
159 *highlighting the significant induction of cell cycle and DNA damage genes during BKPyV infection*  
160 *compared to controls (n=7 independent donors). (B) The 305 genes significantly induced by BKPyV-*  
161 *infection were plotted to show their induction by BKPyV in relation to the post-infection addition of*  
162 *IFN $\gamma$ . Addition of IFN $\gamma$  suppressed expression of the vast majority of BKPyV-induced genes (t=-17.57;*  
163 *p=1.97x10<sup>-47</sup>). The chemokines CXCL10 and CXCL11 were notable exceptions, where the addition of*  
164 *IFN $\gamma$  dramatically increased expression. (C) 14dpi Western blot densitometry for DNA replication*  
165 *licensing factor MCM2 with exemplar blot image below x-axis. Whole blots for MCM2 can be found in*  
166 *Extended Data Fig. 8. (D) Indirect immunofluorescence labelling of Ki67 (green) in BKPyV infected NHU*  
167 *cells shows nearly all Ki67-positive cells have a few large nucleolar granules, characteristic of the G2*  
168 *cell cycle stage. DNA was stained with Hoechst 33258 (blue). White scale bar denotes 10  $\mu$ m. (E) Ki67*  
169 *labelling indices for quiescent, G0-arrested control cultures were low (mean=1.99%  $\pm$ 0.94). BKPyV*  
170 *infection led to a significant (p=0.0319) increase in Ki67 labelling index (mean=41.8  $\pm$ 20.62). (F) BKPyV*  
171 *infection also led to a significant increase in MCM2 labelling index (p<0.05; Extended Data Fig. 10).*  
172 *When cells from infected cultures were separated into LT-Ag positive and negative populations, there*  
173 *was a mean 5.6-fold ( $\pm$ 4.0) increase in MCM2 labelling of LT-Ag negative cells from BKPyV-infected*  
174 *cultures from all donors when compared to controls. The red colouration for LT-Ag positive cells applies*  
175 *only to panel F.*

176

177

178 BKPyV regulates the cell cycle in part via LT-Ag interactions through its LxCxE domain with  
179 Retinoblastoma protein (pRb; Fig. 4A). GSEA supported the role of pRb disruption (Extended Data Fig.  
180 12A-C) in driving proliferation, and phosphorylation of pRb was significantly (p<0.05) both increased  
181 by BKPyV and reduced by IFN $\gamma$  exposure (Fig. 4B; Extended Data Fig. 13). Indirect immunofluorescence  
182 co-labelling of phosphorylated-pRb and the LT-Ag revealed BKPyV triggered an increase in  
183 phosphorylated-pRb labelled cells and that significantly fewer cells became positive in the presence  
184 of IFN $\gamma$  (both p<0.01; Extended Data Fig. 11). Using LT-Ag labelling (to distinguish infected from non-  
185 infected cells in infected cultures), 63.1-fold ( $\pm$ 57.1) more phosphorylated-pRb positive cells were  
186 present in the LT-Ag negative fraction of BKPyV-exposed cultures compared to control cultures (Fig.  
187 4C). pRb phosphorylation and cell cycle re-entry by infected and adjacent cells could contribute to  
188 tumour promotion in initiated cells.

189 The inhibition of pRb either by LT-Ag-binding or phosphorylation releases EZH2 to join the polycomb  
190 repressive complex 2 (PRC2) dimerization partners to drive transcription<sup>20</sup>. Involvement of EZH2/PRC2

191 was supported by gene-set enrichment analysis (Extended Data Fig. 12D). Transcription and protein  
192 expression of EZH2 was induced by BKPyV infection and reduced by IFN $\gamma$  (Fig. 4D&E; Extended Data  
193 Fig. 14). Expression of the pRb target, *E2F1* was increased by BKPyV infection ( $p < 0.001$ ; Fig. 4F) along  
194 with other members of the E2F family (Extended Data Fig. 15). Increased E2F-activity was evidenced  
195 by gene-set enrichment of E2F1 targets in BKPyV infected cells (Extended Data Fig. 12E-G). To confirm  
196 this finding we analysed the overlap in genes associated with previously reported E2F1 ChIPseq  
197 peaks<sup>21</sup> and BKPyV-induced genes and found a significant (exact hypergeometric probability  
198  $p < 4.95 \times 10^{-106}$ ; representation factor = 38.6) overlap of 82 genes (Fig. 4G; gene lists in Extended Data  
199 Fig. 16).

200 Expression of the late cell cycle-associated transcription factor *FOXM1* was also induced by BKPyV  
201 infection (Fig. 4H). In agreement, GSEA supported its activity (Extended Data Fig. 12H). There was a  
202 substantial (exact hypergeometric probability  $p < 1.30 \times 10^{-80}$ ; representation factor = 43.8) overlap  
203 between genes up-regulated upon BKPyV infection and genes associated with FOXM1 binding<sup>22</sup>,  
204 indicative of these genes as direct targets for FOXM1 (Fig. 4G; gene lists in Extended Data Fig. 16).  
205 Taken together, increased levels and activities of E2F1 and FOXM1 accounts for 40% of the  
206 transcriptome induced by BKPyV-infection (Fig. 4G).

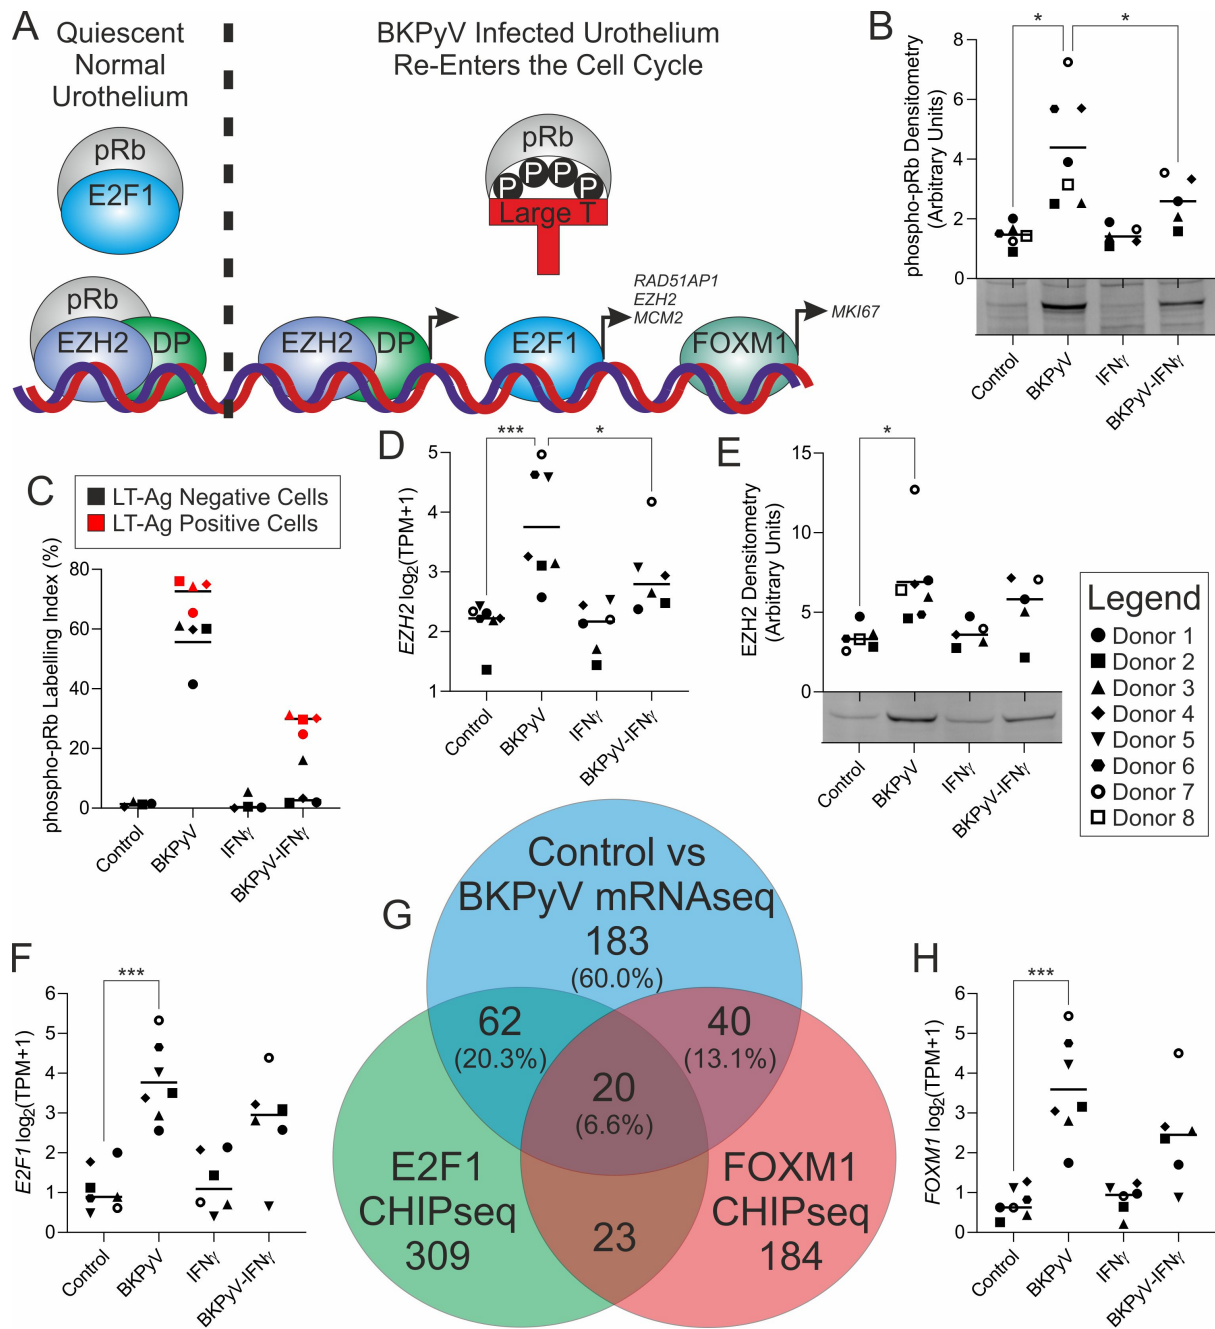

207

208 *Fig. 4 – BkPyV regulates cell cycle re-entry through inactivating phosphorylation of retinoblastoma*  
 209 *protein. (A) Schematic summary of proposed BkPyV cell cycle regulation. “pRb” = Retinoblastoma*  
 210 *protein; “DP” = dimerization partners; “P” = phosphorylation. (B) Western blotting of retinoblastoma*  
 211 *protein phosphorylated at serine 807/811 shows a significant infection-associated increase that was*  
 212 *suppressed by IFN $\gamma$ . (C) BkPyV infection also led to a significant increase in phosphorylated-pRb*  
 213 *labelling index ( $p < 0.01$ ; Extended Data Fig. 13). When cells from infected cultures were split into LT-Ag*  
 214 *positive and negative populations, there was mean 63.1-fold ( $\pm 57.1$ ) increase in phosphorylated-pRb*  
 215 *labelling of LT-Ag negative cells from BkPyV-infected cultures from all donors when compared to non-*  
 216 *infected controls. The red colouration for LT-Ag positive cells applies only to panel C. (D&E) mRNAseq*

217 *and Western blotting respectively show a BKPyV-mediated increase in expression of the DREAM*  
218 *complex member EZH2. (F) mRNAseq shows significant induction of the retinoblastoma-regulated E2F1*  
219 *transcription factor. (G) Comparison of genes significantly 2-fold induced by BKPyV infection with those*  
220 *reported to possess proximal E2F1<sup>21</sup> and FOXM1<sup>22</sup> ChIP-seq peaks, suggests 40% of the induced*  
221 *transcriptome may be activated by these transcription factors. (H) mRNAseq shows significant*  
222 *induction of the FOXM1 transcription factor by BKPyV.*

223

224 GSEA further revealed activation of the DNA damage response by BKPyV (Extended Data Fig. 6B) and  
225 in particular, genes implicated in homologous recombination and displacement loop structures  
226 (Extended Data Fig. 12I&J). Stabilisation of p53 protein was observed by Western blotting and indirect  
227 immunofluorescence during BKPyV infection (Fig. 5A and Extended Data Fig. 17); however, this  
228 stabilisation was not associated with increased transcription of p53 target genes consistent with LT-  
229 Ag inhibition (Fig. 5B). *RAD51* and *RAD51AP1* were significantly induced by BKPyV (mean log<sub>2</sub> fold  
230 change 3.50 and 4.47, respectively; both  $p < 0.001$ ; Fig. 5C&D). These genes are of special interest  
231 because of their key roles in the formation of single-stranded DNA displacement loops, which could  
232 form substrates for cytosine deamination by APOBEC3 proteins. Increased Rad51 protein was  
233 confirmed by Western blotting, where a slight increase in molecular size indicated possible activating-  
234 phosphorylation of the induced Rad51 by the Chk1 kinase<sup>23</sup>, whose transcription was also significantly  
235 induced (Fig. 5E; Extended Data Fig. 18). Indirect immunofluorescence labelling of Rad51 identified  
236 nuclear speckles forming during BKPyV infection (Extended Data Fig. 18) and image analysis showed  
237 the appearance of nuclear speckles was significant ( $p = 0.0037$ ; Figure 5F). The LT-Ag of JCPyV was  
238 previously shown to activate the *RAD51* promoter and the two proteins were shown to co-localise in  
239 JCPyV infections<sup>24</sup>. Indirect immunofluorescence confirmed both the presence of nuclear Rad51  
240 speckles in urothelial cells, and co-localisation of Rad51 with the BKPyV LT-Ag (Fig. 5F).

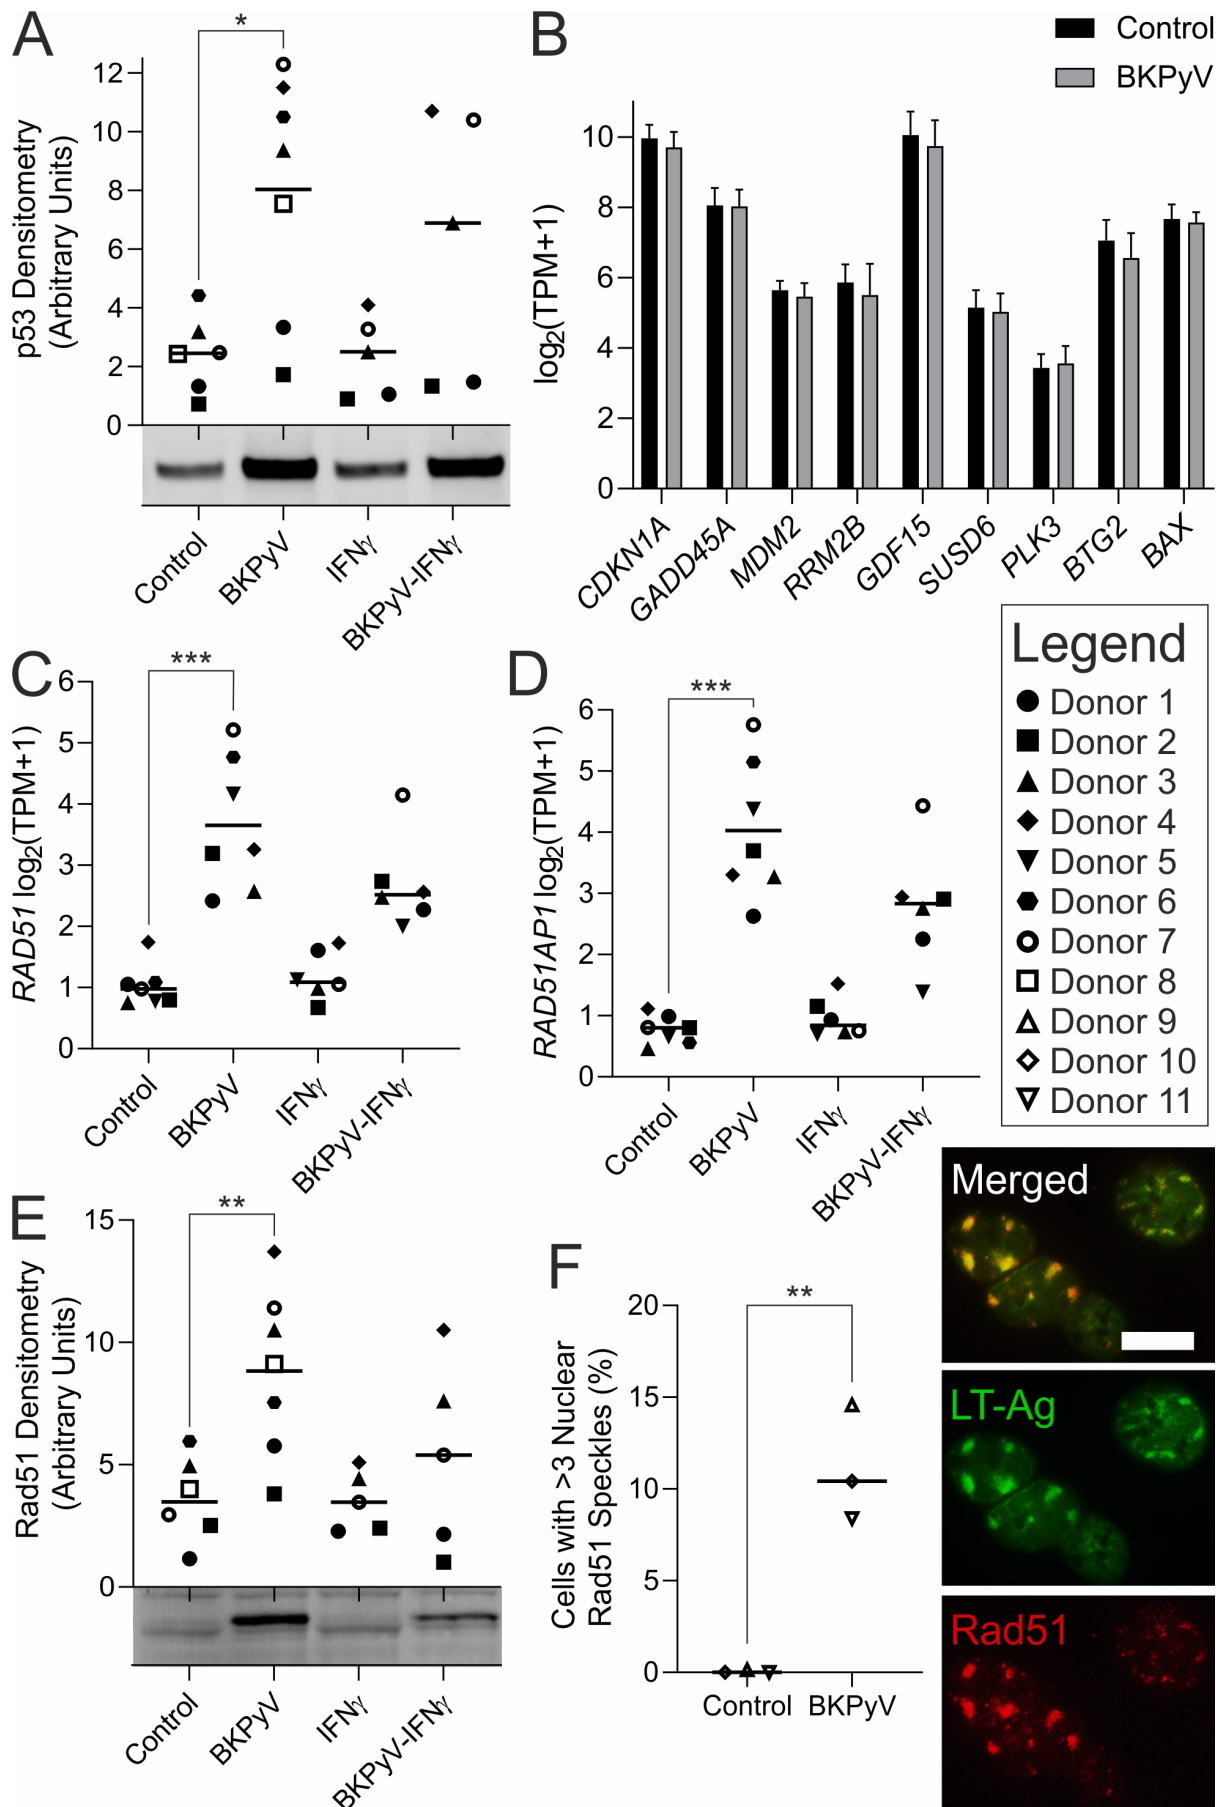

242 *Fig. 5 – Homologous recombination was induced by BKPyV infection of human urothelium. (A) Western*  
243 *blotting for p53 protein showed significant stabilisation (no increase in transcription was observed)*  
244 *during BKPyV infection. (B) However, there was no increased expression of verified p53 target genes<sup>25</sup>.*  
245 *(C) RAD51 and (D) RAD51AP1 transcripts were significantly induced by BKPyV infection. (E) Western*  
246 *blotting confirmed significant Rad51 protein induction and phosphorylation was observed as a slight*  
247 *increase in molecular weight when Rad51 was induced by BKPyV. (F) Analysis of indirect*  
248 *immunofluorescence for Rad51 found nuclear speckles were significantly increased in BKPyV infection.*  
249 *In some cells, indirect immunofluorescence revealed LT-Ag and Rad51 protein colocalisation to large*  
250 *granular deposits in the nuclei of BKPyV-infected urothelial cells. Scale bar denotes 10  $\mu$ m,*  
251 *immunofluorescence performed on n=3 independent donors with representative images shown. Full*  
252 *blots and further immunofluorescence images for p53 and Rad 51 in Extended Data Fig. 17 & 18,*  
253 *respectively.*

254

255 To explore the possible involvement of APOBEC3 cytidine deaminases (enzyme family expression data  
256 Extended Data Fig. 19), we investigated the expression of *APOBEC3A* and *APOBEC3B*, which have been  
257 implicated in the increased mutational burden in virally driven cancers, such as HPV<sup>26</sup>. *APOBEC3A* and  
258 *APOBEC3B* transcription was highly variable between donors (Fig. 6A and B). *APOBEC3A* transcript  
259 was increased by BKPyV infection in some donors (Donors 6 & 7 showed >2-fold induction) but this  
260 trend was not replicated in other donor lines (Fig. 6A). The *APOBEC3B* transcript was significantly  
261 induced >2-fold in 5 of 7 BKPyV-infected donors (mean log<sub>2</sub> fold change  $1.78 \pm 1.31$ ;  $p < 0.01$ ; Fig. 6B).  
262 The *APOBEC3B* promoter was recently shown to be a direct target of pRb/E2F signalling<sup>27</sup>; which is  
263 consistent with the pRb/E2F and *APOBEC3B* induction reported here. When *APOBEC3B* expression  
264 was compared with viral transcripts, its TPM value was most significantly correlated with LT-Ag  
265 (Pearson Rho=0.98,  $p=1.407 \times 10^{-9}$ ; Extended Data Fig. 20). However, the *APOBEC3A* transcript was not  
266 correlated with BKPyV transcripts (Extended Data Fig. 20). *APOBEC3A* and *APOBEC3B* expression can  
267 be induced by interferons, but this has been reported to be limited in urothelial cancer cell lines as  
268 compared to breast cancer lines<sup>28</sup>. Interestingly, IFN $\gamma$  did not stimulate expression of either gene in  
269 NHU cells (Fig. 6A-D). Nor was their expression increased by IFN $\gamma$  in BKPyV-infected cells (Fig. 6A-D).

270 APOBEC3 protein abundance was studied by Western blotting (Fig. 6C&D, Extended Data Fig. 21).  
271 APOBEC3A has two enzymatically-active isoforms, with a smaller variant generated by internal  
272 translation initiation at a methionine at position 13 (Met<sup>13</sup>)<sup>29</sup>. Both APOBEC3A isoforms were  
273 increased in all donors following BKPyV infection ( $p=0.0025$ ; Fig. 6C), although there was large  
274 variation in the magnitude of increase. In cells from Donors 4 & 5, APOBEC3A protein abundance in

275 BkPyV-infected cultures was increased >2-fold by IFN $\gamma$  exposure (Fig. 6C). APOBEC3B was significantly  
276 increased by BkPyV infection ( $p=0.0054$ ; Fig. 6D). Unexpectedly, IFN $\gamma$  slightly reduced APOBEC3B  
277 protein abundance in BkPyV-infected cultures (Fig. 6D). Western blot densitometry was significantly  
278 correlated with TPM for both APOBEC3A and APOBEC3B ( $p=0.0147$  and  $p=0.0003$ , respectively).  
279 Densitometry analysis suggested that during BkPyV infection, the ratio of APOBEC3A to APOBEC3B  
280 protein was 1.95:1 ( $\pm 1.18$ ;  $n=7$ ).

281 A recent study identified RNA-editing of the *DDOST* transcript at cytosine 558 to be a common activity  
282 of APOBEC3A that was not observed with APOBEC3B<sup>30</sup>. *DDOST* transcript editing was mildly increased  
283 in 6/7 donors by BkPyV infection (25.2% increase  $\pm 23.9$ ; Fig. 6E). Across all mRNAseq samples ( $n=26$ )  
284 *DDOST* C558U variant transcript frequency (VTF) was significantly correlated with *APOBEC3A* TPM  
285 (Pearson Rho=0.803;  $p=5.205 \times 10^{-7}$ ) but not *APOBEC3B* TPM (Pearson Rho=0.278;  $p=0.167$ ; Extended  
286 Data Fig. 22).

287 APOBEC3-activity was assessed by deaminase assays using single stranded DNA probes conjugated to  
288 fluorochromes (Fig. 6F). BkPyV infection significantly increased deaminase activity against a linear  
289 probe with an RTCA motif that is the substrate preference of APOBEC3B (mean log<sub>2</sub> fold change 1.66  
290  $\pm 1.05$ ;  $p=0.0303$ ; Fig. 6F, Extended Data Fig. 23). Linear regression analysis confirmed significant  
291 relationships between the deaminase activity and *APOBEC3B* protein abundance ( $F=33.19$ ,  $df=21$ ;  
292  $p<0.0001$ ) and to a lesser extent *APOBEC3A* protein ( $F=5.030$ ,  $df=21$ ;  $p=0.0358$ ) (Extended Data Fig.  
293 24). Further studies using a hairpin probe assay, designed to favour APOBEC3A-activity<sup>31</sup> also showed  
294 increased activity following BkPyV-infection. The addition of RNA, demonstrated to inhibit APOBEC3B,  
295 but not APOBEC3A activity<sup>31</sup>, had no effect on deamination of the hairpin substrate, suggesting that  
296 APOBEC3A-activity was induced by BkPyV infection (Extended Data Fig. 25).

297 The nature of APOBEC mutagenesis, being widely distributed throughout the genome in mostly extra-  
298 genic regions, combined with the lack of clonal expansion in this experimental model meant that it  
299 was not possible to confirm APOBEC-activity through an RNA-derived mutational signature (Extended  
300 Data Fig. 26). APOBEC-activity in the genome converts cytosine to uracil, which requires excision by  
301 the uracil DNA glycosylase enzyme that leaves an apurinic/apyrimidinic (AP) site suitable for  
302 subsequent repair. The uracil-DNA glycosylase enzyme gene "*UNG*" was significantly induced by  
303 BkPyV-infection ( $p<0.05$ ; Fig. 6G). Furthermore, the increased deaminase activity observed in BkPyV  
304 infection (Fig. 6F) was associated with significant ( $p<0.001$ ) damage to the host genome, measured as  
305 an increase in AP sites (Fig. 6H). Linear regression analysis confirmed a significant relationship between  
306 AP sites and APOBEC3B protein abundance ( $F=9.033$ ,  $df=17$ ;  $p=0.008$ ) but not APOBEC3A ( $F=1.190$ ,  
307  $df=17$ ;  $p=0.185$ ; Extended Data Fig. 27).



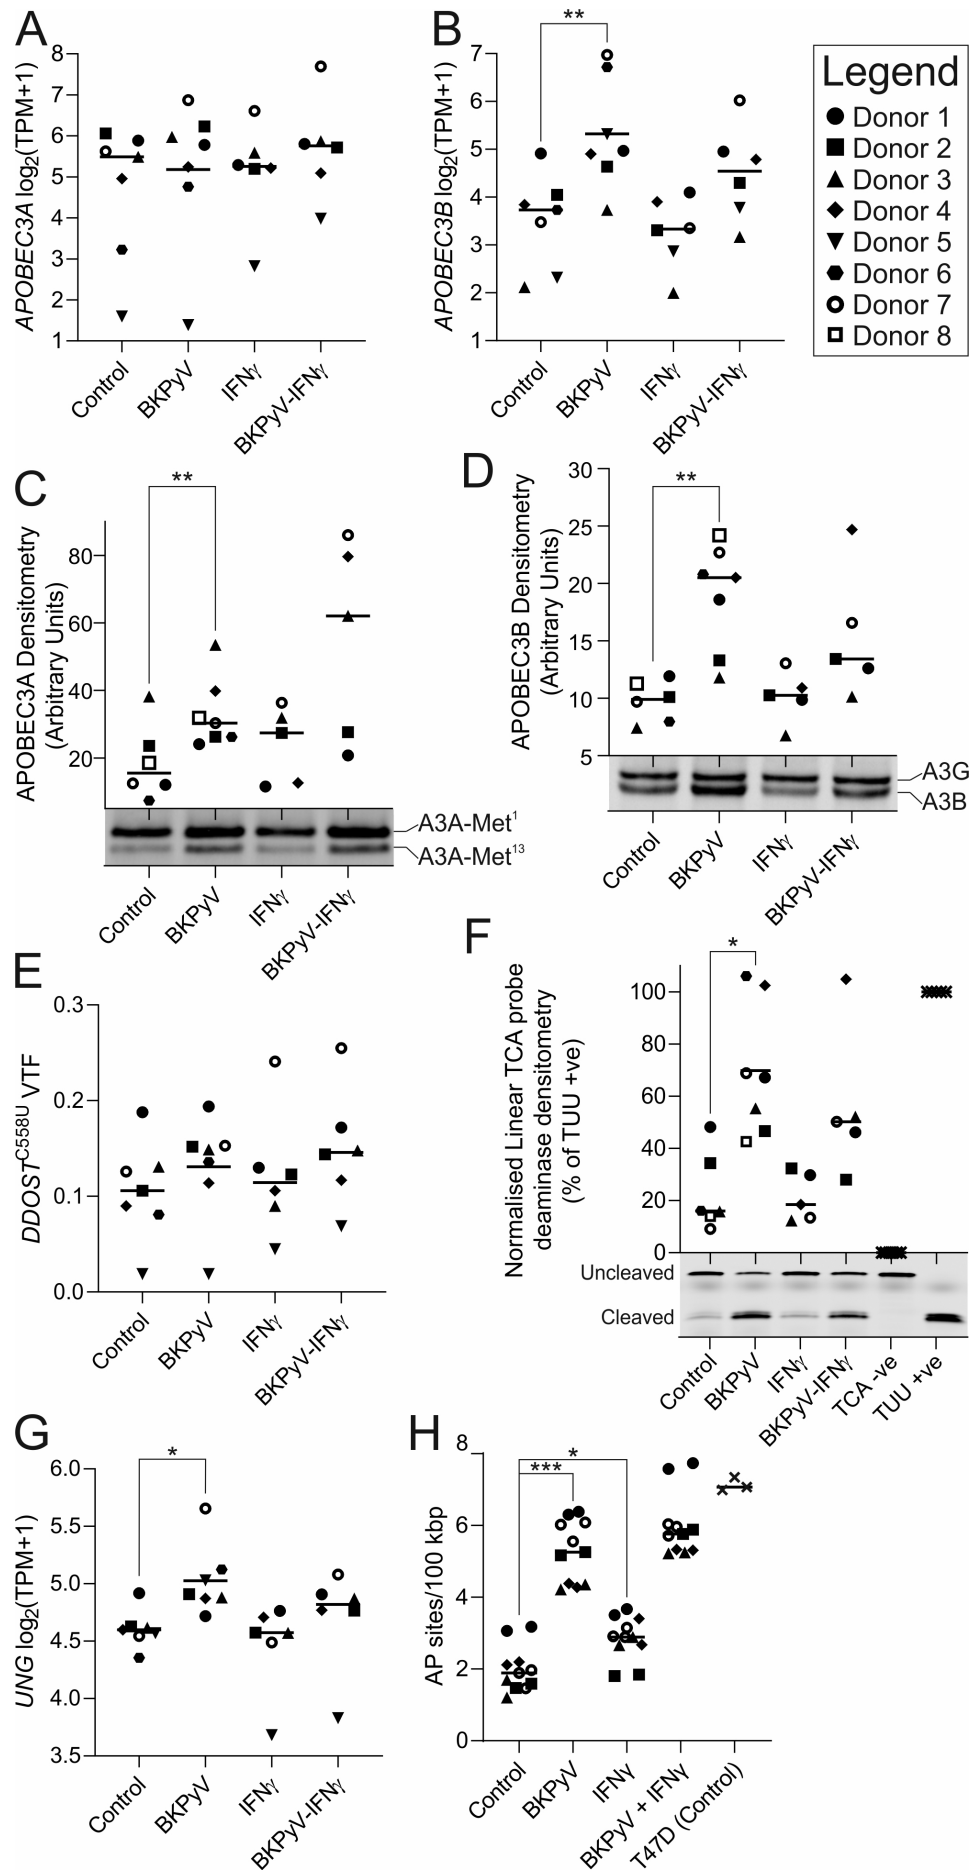

309 *Fig. 6 – APOBEC3 expression and activity in normal human urothelium. mRNAseq expression data for*  
310 *APOBEC3A and APOBEC3B transcripts found only APOBEC3B was significantly ( $q=0.0023$ ) induced by*  
311 *BKPyV infection (panel A and B, respectively). (C) Western blotting for APOBEC3A (“A3A”; full-length*  
312 *and truncated protein from the internal Met<sup>13</sup> start site were analysed together as both possess*  
313 *catalytic activity<sup>29</sup>) found a slight but significant ( $p=0.0133$ ) induction by BKPyV infection. (D)*  
314 *APOBEC3B (“A3B”) and APOBEC3G (“A3G”) bands appear close together on the blots and densitometry*  
315 *shown here is for APOBEC3B only (as APOBEC3G expression was not altered). APOBEC3B protein was*  
316 *significantly induced by BKPyV infection ( $p=0.0025$ ). Full Western blots scans for panels C and D with*  
317 *densitometry for APOBEC3G are provided in Extended Data Fig. 15. (E) Variant transcript frequency*  
318 *(VTF) for APOBEC-mediated C>U editing of DDOST RNA at cytosine 558 quantified by mRNAseq was*  
319 *increased slightly, but not significantly, in 6/7 donors by BKPyV infection. Donors 5 and 7 appeared to*  
320 *show an IFN $\gamma$ -mediated induction of APOBEC3A-function. (F) Deaminase assays for NHU protein lysates*  
321 *against a linear RTCA probe preferentially targeted by APOBEC3B confirm showed significant induction*  
322 *of activity following BKPyV infection. Significance was tested using a Wilcoxon matched-pairs signed*  
323 *rank test ( $p=0.0313$ ). Full deaminase gel scans are provided in Extended Data Fig. 17. Deaminase*  
324 *assays were also performed against a YTCA hairpin probe, in the presence and absence of RNA, to*  
325 *evaluate APOBEC3A activity (Extended Data Fig. 18). (G) mRNAseq expression data for the uracil-DNA*  
326 *glycosylase gene UNG found it was significantly induced by BKPyV infection ( $q=0.0213$ ). (H)*  
327 *Apurinic/aprimidinic (AP) sites assay. The assay was performed on DNA from five independent donors*  
328 *with 2-3 independent cultures per donor. T74D breast cancer cells were included as a positive control*  
329 *known to generate apurinic/aprimidinic sites in their genomes<sup>32</sup>. The legend in the top right identifies*  
330 *the donor by specific point shapes in all dot plot panels.*

331

332 To understand how APOBEC3-activity is relates to viral infection, proximity ligation assays were used  
333 to study protein:protein interactions. LT-Ag is a critical biological effector of the BKPyV life-cycle and  
334 has previously been shown to interact directly with pRb<sup>33</sup>. Here we used the pRb:LT-Ag interaction as  
335 a positive control for proximity ligation assays and included ZO3:LT-Ag as a negative control (zonula  
336 occludins 3 (ZO3) is a differentiated urothelial tight junction member and not known to enter the  
337 nucleus; Fig. 7). LT-Ag appeared to co-localise with Rad51 by indirect immunofluorescence (Fig. 5F)  
338 and proximity ligation assays confirmed that the two proteins were frequently within <40 nm of one  
339 another (Fig. 7). In addition, APOBEC3 enzymes co-localised with LT-Ag in the nuclei of infected  
340 urothelial cells (Fig. 7). LT-Ag has been shown to bind dsDNA and act as a helicase; however, the  
341 precise nature of LT-Ag’s binding partners and complex membership remains to be resolved. It is  
342 tempting to hypothesise that LT-Ag acts as a lynchpin bringing multiple factors together around

343 displacement loops to harness DNA repair enzymes for viral genome replication but additionally  
344 leading to collateral damage of the host genome (summarised Fig. 8).

345

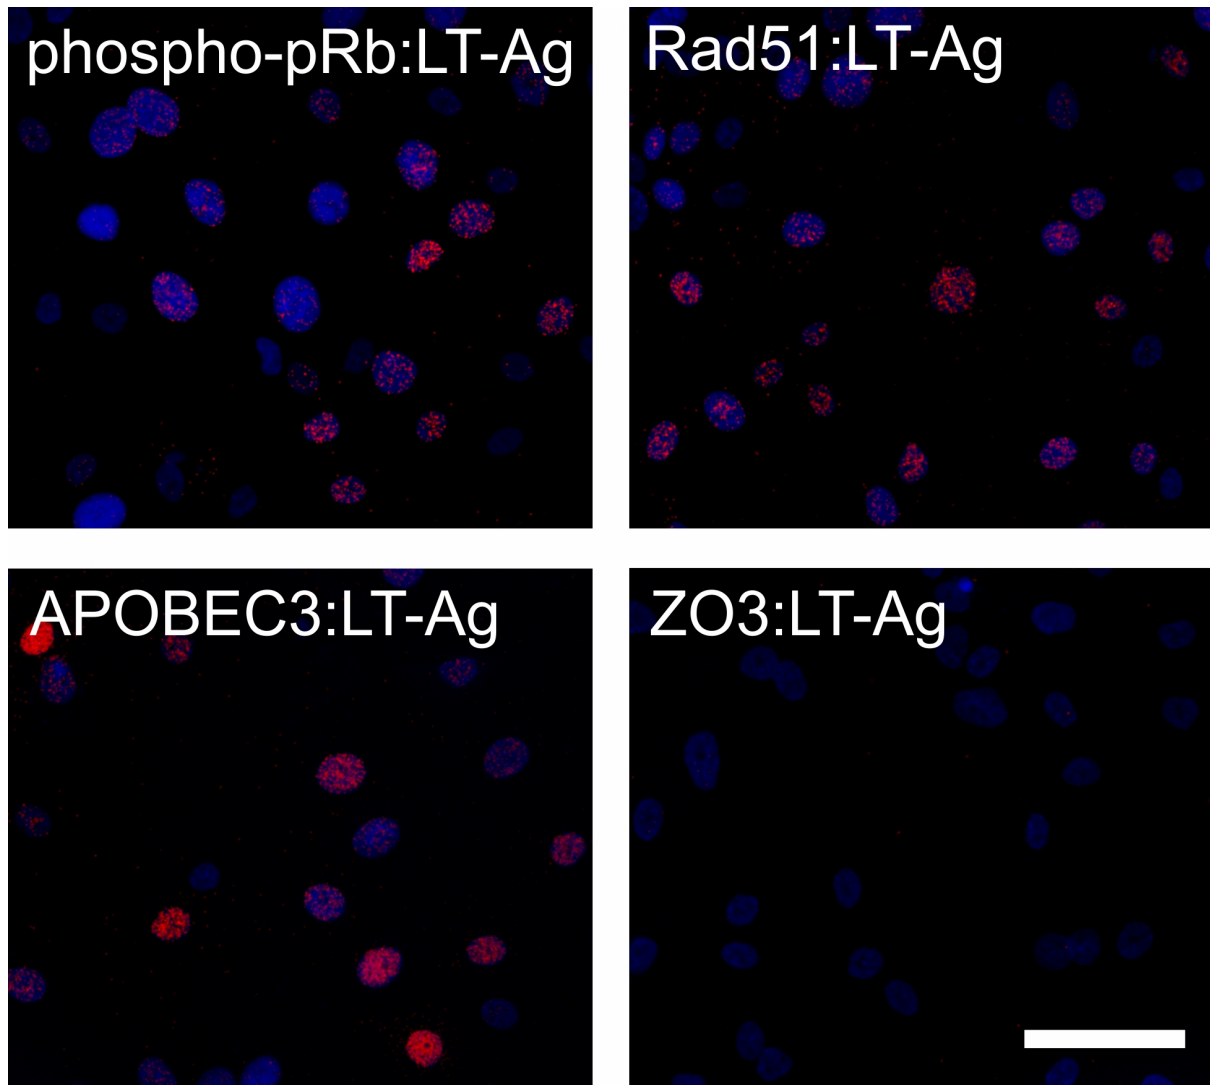

346

347 *Fig. 7 – Proximity ligation assays suggested that during BKPyV infection of human urothelium, nuclear*  
348 *complexes form involving large T antigen (LT-Ag) and phospho-Retinoblastoma (phospho-pRb), Rad51*  
349 *and the APOBEC3 proteins. Zonula occludins 3 (ZO3) is a tight junction protein critical for differentiated*  
350 *urothelial barrier formation and expressed in this tissue model at cell:cell junctions included here as a*  
351 *negative control. Scale bar denotes 50  $\mu$ m, n=3 donors (Extended Data Fig.28-30).*

## 352 Discussion

353 Tracking the molecular events leading to human epithelial malignancy can be challenging when the  
354 carcinogenic event may have occurred decades in the past. Genomic mutational signatures offer  
355 insight but, in the case of bladder cancer, controversy exists between the putative epidemiological risk  
356 from smoking and mutational signatures found in tumours<sup>1, 7</sup>, which suggest a missing viral agency.  
357 Using a tissue-mimetic *in vitro* model that replicates both the barrier and mitotic quiescence of human  
358 urothelium *in situ*, we here provide the first experimental evidence that BKPyV can directly infect  
359 differentiated human urothelium, driving the host cells out of mitotic quiescence to facilitate the viral  
360 life cycle. This is achieved by viral LT-Ag mediated inactivation of the host tumour suppression  
361 machinery, including p53 and pRB. A key corollary of these events is the acquisition of host genomic  
362 damage through APOBEC3A/B activity, which we associate with DNA displacement loops formed  
363 during homologous recombination at the G2/M checkpoint (Summarised Fig. 8). This evidence  
364 establishes BKPyV as an infectious agent with the capacity to damage the urothelial genome with the  
365 potential to initiate carcinogenesis.

366 Indirect evidence supporting the relevance of these pathways comes from observations that BLCAs  
367 are more common in immune-suppressed patients following solid organ transplant (standardised  
368 incidence ratio 1.52<sup>34</sup>) and in particular kidney transplant (meta-analysis standardised incidence ratio  
369 2.46<sup>35</sup>). Indeed, where a renal transplant patient tests positive for BKPyV activity, one retrospective  
370 study of male transplant patients found the risk of BLCA increased >8-fold<sup>36</sup>. The time from renal  
371 transplant to BLCA diagnosis was an average of 9.6 years in a recent study<sup>37</sup>, comparable with the  
372 known disease course in HPV-driven tumours. Other biological processes leading to immune-  
373 insufficiency, including ageing, may also be sufficient to trigger BKPyV reactivation and lead to  
374 transient reinfection of the urothelium, driving host cell-cycle activity and genomic damage. In light  
375 of this, we propose due consideration be given to BKPyV vaccine development<sup>38</sup> and subsequent trials  
376 with an initial focus on renal transplant patients as an at-risk population where significant benefits in  
377 terms of graft outcomes and urinary tract pathologies (including cancer) are likely. Viewed through  
378 the prism of BKPyV as a risk factor for BLCA, a number of features of the disease that are not currently  
379 understood (including risk factor interactions<sup>39</sup> and pronounced gender differences<sup>40</sup>) might start to  
380 be explained.

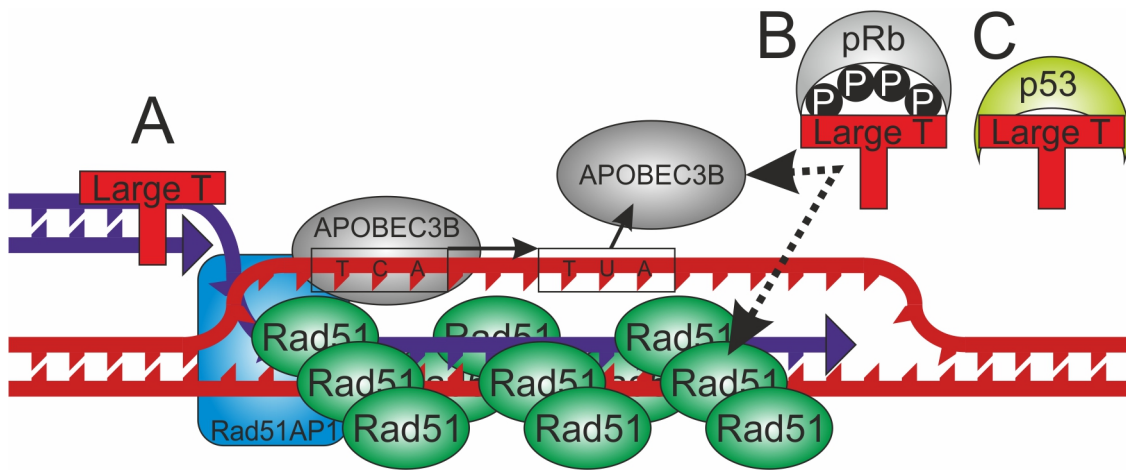

381

382 *Fig. 8 – Schematic of hypothetical model of urothelial DNA damage at displacement loops at the G2*  
383 *checkpoint during BKPyV infection. LT-Ag interactions might derive from (A) its DNA-binding helicase*  
384 *activity or (B) one of the other dimerization domains present in the LT-Ag protein. (C) LT-Ag inhibition*  
385 *of p53 is likely important for this process as p53 would normally prevent Rad51 oligomerisation by*  
386 *direct binding<sup>41</sup>. The evidence from this study is most robust for BKPyV-induced APOBEC3B activity but*  
387 *APOBEC3A protein was consistently more abundant during infection and its role requires further*  
388 *validation.*

## 389 **Methods**

### 390 *Normal Human Urothelial (NHU) Cell Culture*

391 Eleven independent NHU cell lines of finite (non-immortalised) lifespan were used in this study. The  
392 cell lines were established as described<sup>42</sup> using anonymous discarded tissue from renal transplant  
393 surgery, with NHS Research Ethics Committee approval. NHU cells were propagated in Keratinocyte  
394 Serum-Free Medium (KSFM; 0.09mM Ca<sup>2+</sup>) supplemented with bovine pituitary extract, recombinant  
395 human EGF and cholera toxin. Following expansion, NHU cells were differentiated in medium  
396 supplemented with adult bovine serum and [Ca<sup>2+</sup>] elevated to 2mM, according to published  
397 methods<sup>15</sup>.

398

### 399 *BKPyV Infection and IFN $\gamma$ Treatment*

400 BKPyV Dunlop Strain was expanded for use in renal proximal tubule epithelial cell cultures which were  
401 scrape harvested at 14 days post infection, sonicated and frozen as aliquots at -80 °C. Multiplicity of  
402 infection (MOI) was calculated by fluorescent focus unit assay using IncuCyte ZOOM analysis (Essen  
403 BioScience, Ann Arbor, MI, USA), as previously reported<sup>43</sup>. All cell cultures in this study were infected  
404 with 0.45  $\mu$ m filtered BKPyV containing medium at MOI=1 for 3-4 hours at 37 °C before virus  
405 containing medium was removed and cultures continued.

406 At 7 days post infection (dpi) some cultures were exposed to IFN $\gamma$  (200U/mL, BioTechne #285-IF) for  
407 a further seven days to mimic an immune response to the infection.

408

### 409 *mRNA Analysis*

410 Total RNA was collected in TRIzol reagent (Invitrogen).

411 The relative abundance of selected transcripts was assessed by Reverse Transcribed - quantitative  
412 Polymerase Chain Reaction (RT-qPCR) using the following forward and reverse primers (all 5'-3') to  
413 amplify *LT-Ag* (GAGTAGCTCAGAGGTGCCAACC and CATCACTGGCAAACATATCTTCATGGC<sup>44</sup>), *VP1*  
414 (CTTTGCTGTAGGTGGAGAACCC and CTCCTGTGAAAGTCCCAAATAC<sup>45</sup>) and *GAPDH*  
415 (CAAGGTCATCCATGACAACCTTG and GGGCCATCCACAGTCTTCTG). Primers were optimised to give a  
416 linear response over a 1,000 fold dilution range and a single product as characterised by a single peak  
417 in the dissociation curve. Amplification was monitored using SYBR Green dye on a QuantStudio™ 3  
418 Real-Time PCR System machine (ThermoFisher). All measurements were performed in triplicate and  
419 calculated using the  $\Delta\Delta$ ct method relative to GAPDH expression.

420 Samples from 14dpi were selected for mRNA sequencing (mRNAseq) using the Illumina NovaSeq 6000  
421 generating 150bp paired-end reads (Novogene UK, Cambridge, UK). All mRNAseq data has been

422 deposited at GSEXXX. Following standard quality control, gene-level expression values in transcripts  
423 per million (TPM) were derived against the Gencode v35 human transcriptome using kallisto v0.46.1<sup>46</sup>.  
424 For analysis of the BKPyV transcriptome (Fig. 2A), sequences (derived from BKPyV reference; GenBank  
425 NC\_001538.1) were appended to the human transcriptome to generate “relative TPMs” as a measure  
426 of viral transcript abundance. Reads were also aligned to the human (GRCh38) and BKPyV reference  
427 genome assemblies with HISAT2 v2.2.0<sup>47</sup>, and single nucleotide variants detected following best  
428 practices using GATK v4.1.0<sup>48</sup>, PicardTools v2.20.0<sup>49</sup>, SAMtools v1.10<sup>50</sup> and VCFtools v0.1.15<sup>51</sup>.  
429 Mutational signatures were then processed as previously described<sup>1</sup>.

430 Differentially expressed genes were identified using the sleuth v0.30.0<sup>52</sup> implementation of the  
431 likelihood ratio test (LRT), accounting for matched genetic backgrounds, generating Benjamini-  
432 Hochberg corrected q-values. For volcano plots (performed in R v4.0.4 EnhancedVolcano v1.8.0), fold  
433 change values used a TPM+1 transformation to reduce the influence of low abundance transcripts.

434 To compare manipulations of the culture model,  $\pi$ -values were calculated as described elsewhere<sup>53</sup>:

$$435 \pi = \log_2 \text{fold change (TPM + 1)} \times -\log_{10} \text{LRT } q$$

436 Gene set enrichment analysis (GSEA) was performed using  $\pi$ -values (derived from the Sleuth LRT q-  
437 values) and the pre-ranked list feature implemented in the python package GSEAPy (0.10.2; available  
438 at: <https://github.com/zqfang/GSEAPy>). The ranked list of genes was run against the four following  
439 Molecular Signatures Database (MSigDB) collections: hallmarks (h.all.v.7.2.symbols.gmt), curated  
440 (c2.all.v.7.2.symbols.gmt), gene ontology (c5.all.v.7.2.symbols.gmt), and oncogenic signatures  
441 (c6.all.v.7.2.symbols.gmt) (available at: [https://data.broadinstitute.org/gsea-  
442 msigdb/msigdb/release/7.2/](https://data.broadinstitute.org/gsea-msigdb/msigdb/release/7.2/)).

443 Overlap between genes significantly 2-fold induced by BKPyV-infection and previously reported  
444 E2F1/FOXM1 ChIPseq peaks<sup>21,22</sup> was assessed by calculating the exact hypergeometric probability.

445

#### 446 *Indirect Immunofluorescence*

447 NHU cell cultures on glass 12-well slides were fixed in methanol:acetone (50:50 v/v) 30 seconds, air  
448 dried and stored frozen.

449 Primary antibodies, applied overnight at 4°C, were anti-SV40 LT-Ag (1:200, mouse monoclonal “Pab  
450 108”, Santa Cruz Biotechnology, sc-148), anti-VP1 (1:100, mouse “pab597”, kind gift from Chris Buck  
451 at the National Institute of Health, Bethesda), anti-Rad51 (1:1,000, rabbit “EPR4030(3)”, Abcam  
452 #ab133534), anti-Ki67 (1:400, mouse, “MM1”, Leica, NCL-L-Ki67-MM1), anti-MCM2 (1:500, rabbit,  
453 “D7G11”, Cell Signalling #3619), anti-Phospho-pRb Serine 608/807/811 (1:500, rabbit, Cell Signalling  
454 #9308), anti-p53 (1:40, mouse, “D01”, Cell Signalling #18032), anti-ZO3 (1:800, rabbit, Cell Signalling  
455 #3704) and anti-APOBEC3A/B/G (1:100 rabbit monoclonal, clone 5210-87-13<sup>54</sup>).

456 Unbound primary antibodies were removed by washing in phosphate-buffer saline (PBS) and  
457 secondary antibodies (Goat-anti-Mouse Alexa-488 and Goat-anti-Rabbit Alexa-594, Molecular Probes)  
458 were applied for 1 h at ambient temperature. Slides were washed in PBS, with 0.1 µg/ml Hoechst  
459 33258 added to the penultimate wash, before mounting in ProLong Gold Antifade Mountant  
460 (ThermoFisher) and visualisation by epifluorescence on a BX60 microscope (Olympus).

461 Image analysis was performed in ImageJ (v1.53c Java 1.8.0\_172) by creating regions of interest (ROI)  
462 around the nuclei in images of Hoechst 33258 DNA staining. Corresponding images of antibody  
463 labelling were subsequently overlaid using the ROI manager. To derive labelling indices, nuclear  
464 intensity in a minimum of 1,000 cells was calculated and a threshold for labelling intensity was  
465 established on an appropriate negative control sample. Analysis of Rad51 nuclear speckles was  
466 performed using the Speckle Inspector tool from the BioVoxel Toolbox (v2.5.1) in a minimum of 1,000  
467 cells. Nuclei with three speckles or fewer were disregarded.

468

#### 469 *Proximity Ligation Assays (PLA)*

470 NHU cell cultures on glass 12-well slides were fixed in 10% neutral buffered formalin for 10 minutes  
471 before permeabilisation in PBS (phosphate-buffered saline) containing 0.5% (w/v) Triton X-100 for 30  
472 minutes. PLA were performed using the Duolink® In Situ Red kit as per the manufacturer's instructions  
473 (Sigma). Finally, slides were fixed in Methanol:Acetone (50:50 v/v) for 30 seconds and air-dried before  
474 mounting in Duolink® In Situ Mounting Medium with DAPI. Epifluorescence was visualised on a BX60  
475 microscope (Olympus).

476

#### 477 *Protein Lysate Collection*

478 Cell cultures in 10cm dishes were scrape-harvested in 500 µL lysis buffer containing 0.2% (v/v)  
479 protease inhibitors (Protease Inhibitor Cocktail set III, Calbiochem). Lysis buffer comprised: 25 mM  
480 HEPES-KOH (pH 7.5), 10% glycerol, 150 mM NaCl, 0.5% Triton X-100, 1 mM  
481 ethylenediaminetetraacetic acid. Lysates were sonicated and clarified by centrifugation at 13,000 g. A  
482 bicinchoninic acid (BCA) protein assay (ThermoScientific) was used to normalise loading into western  
483 blots and deaminase assays.

484

485



486 *Western Blotting*

487 Fifty µg of protein lysate per lane was resolved on NuPAGE gels using the Novex electrophoresis  
488 system (Invitrogen) at 200 V. Electrotransfer to PVDF-FL membranes (Millipore) was completed in a  
489 Tris–glycine buffer at 30 V for 2 h at 4°C before appropriate blocking. The test antibodies used were  
490 anti-SV40 LT-Ag (1:250, mouse monoclonal “Pab 108”, Santa Cruz Biotechnology, sc-148), anti-VP1  
491 (1:250, mouse “pab597”, kind gift from Chris Buck at the National Institute of Health, Bethesda), anti-  
492 MCM2 (1:1,000, rabbit, “D7G11”, Cell Signalling #3619), anti-Phospho-pRb Serine 608/807/811  
493 (1:1,000, rabbit, Cell Signalling #9308), anti-EZH2 (1:1,000, rabbit “D2C9”, Cell Signalling #5246), anti-  
494 p53 (1:1,000, mouse, “D01”, Cell Signalling #18032), anti-Rad51 (1:10,000, rabbit “EPR4030(3)”,  
495 Abcam #ab133534), anti-APOBEC3A/B/G (1:800 rabbit monoclonal, clone 5210-87-13<sup>54</sup>).  
496 Homogeneous loading and transfer were evaluated using β-actin antibodies (Sigma, Clone AC15,  
497 Mouse, 1:10,000 dilution). Membranes were labelled with the appropriate IRDye conjugated  
498 secondary antibody (LI-COR) at ambient temperature for 1 h and visualised by epifluorescent infrared  
499 illumination at 700 and/or 800 nm using the Odyssey Sa scanner and software (LI-COR). Densitometry  
500 was performed using Image Studio Lite Ver 5.0 software (LI-COR). Cropped Western blots are shown  
501 in the main Fig.s with full blots provided as Extended Data Fig.s 4-6. Western blots were loaded with  
502 equal protein amount in every lane and correct loading/transfer was confirmed by probing for β-actin  
503 (Extended Data Fig. 4).

504

505 *Deaminase Activity Assays*

506 Protein lysate [1µg/µL] was RNase A digested at 37°C for 15 min following addition of 1 µg RNase A  
507 (Qiagen) per 25 µg protein. In Extended Data Fig. 19, the RNase digestion was omitted and 100 ng/µL  
508 of urothelial RNA was added to achieve greater selectivity for APOBEC3A (as previously described<sup>31</sup>).  
509 10 µg protein lysate was mixed with 1 pmol ssDNA substrate (IDT, Germany) and 0.75 U uracil-DNA  
510 glycosylase (UDG; New England Biolabs) in a total volume of 12 µL and incubated at 37 °C for 1 h. 10  
511 µl 1M NaOH was added and samples incubated for 15 min at 37 °C. Finally, 10 µl 1M HCl was added  
512 to neutralize the reaction and samples were separated by electrophoresis through 15% urea-  
513 polyacrylamide gel electrophoresis gels in Tris-borate-EDTA (1x) at 150V for 2 h. Gels were visualised  
514 by epifluorescent infrared illumination at 700 nm using the Odyssey Sa scanner and software (LI-COR).  
515 Densitometry was performed using Image Studio Lite Ver 5.0 software (LI-COR). A positive TUU probe  
516 and negative control (TCA probe without lysate) were included to aid experimental interpretation.

517 The ssDNA substrates used in these assays were:

518 1) Linear RTCA

519 /5IRDye700/A\*T\*A\*ATAATAATAATAATAATAATATCAATAATAATAATAATAATA\*A\*T\*A

520 2) Linear TUU positive control probe

521 /5IRDye700/A\*T\*A\*ATAATAATAATAATAATAATATUUATAATAATAATAATAATA\*A\*T\*A

522 3) Hairpin YTCA (as previously described “oTM-814”<sup>31</sup> to be selective for APOBEC3A-mediated  
523 deamination in the presence of exogenous RNA)

524 /5IRD700/TTTTATTTTGAATTGTTCAATTGCAAAATTT\*G\*T\*T

525 Asterisks in the DNA probes denote phosphorothioate modifications, which confer resistance to both  
526 endo- and exonucleases, providing increased oligo stability. A graphical description of the method is  
527 provided as Extended Data Fig. 31.

528

#### 529 *Apurinic/aprimidinic Sites Assay*

530 Genomic DNA was extracted from 2-3 independent cultures of NHU cells from each of 5 independent  
531 donors using Nucleospin Tissue (Machery-Nagel) spin columns. Apurinic/aprimidinic (AP) sites were  
532 quantified using the Oxiselect DNA damage ELISA kit (AP sites; STA-324; Cell Biolabs Inc. San Diego,  
533 CA, USA), according to manufacturer's instructions. A standard curve of aldehyde reactive probe DNA  
534 was used to quantify the number of genomic AP sites. The assay was performed using T47D breast  
535 cancer cell DNA as a positive control for AP sites, as we have previously described<sup>32</sup>.

536

#### 537 *Statistical Analysis*

538 Data were assessed for statistical significance using Prism 8.3.0 software (Graphpad). On all graphs  
539 statistical *p* or *q* value significance is represented as follows; \* <0.05, \*\* <0.01 & \*\*\* <0.001.

540

#### 541 *Data Availability Statement*

542 All mRNAseq data that support the findings of this study have been deposited in the NCBI GEO  
543 database with the accession code GSEXXX (to be released upon publication).

544

545

546 *Code Availability Statement*

547 No unique code was used in this manuscript and all code employed is freely available from the cited  
548 sources.

549

550 **Acknowledgements**

551 This study was funded by York Against Cancer.

552 **References**

- 553 1. Baker, S.C., Mason, A.S. & Southgate, J. Procarcinogen Activation and Mutational Signatures  
554 Model the Initiation of Carcinogenesis in Human Urothelial Tissues In Vitro. *Eur Urol* **78**, 143-  
555 147 (2020).
- 556 2. Kean, J.M., Rao, S., Wang, M. & Garcea, R.L. Seroepidemiology of human polyomaviruses.  
557 *PLoS Pathog* **5**, e1000363 (2009).
- 558 3. Chesters, P.M., Heritage, J. & McCance, D.J. Persistence of DNA sequences of BK virus and JC  
559 virus in normal human tissues and in diseased tissues. *J Infect Dis* **147**, 676-684 (1983).
- 560 4. Nickeleit, V. *et al.* Polyomavirus infection of renal allograft recipients: from latent infection  
561 to manifest disease. *J Am Soc Nephrol* **10**, 1080-1089 (1999).
- 562 5. Zhong, S. *et al.* Age-related urinary excretion of BK polyomavirus by  
563 nonimmunocompromised individuals. *J Clin Microbiol* **45**, 193-198 (2007).
- 564 6. Weinreb, D.B. *et al.* Polyoma virus infection is a prominent risk factor for bladder carcinoma  
565 in immunocompetent individuals. *Diagn Cytopathol* **34**, 201-203 (2006).
- 566 7. Robertson, A.G. *et al.* Comprehensive Molecular Characterization of Muscle-Invasive Bladder  
567 Cancer. *Cell* **171**, 540-556 e525 (2017).
- 568 8. Starrett, G.J. *et al.* Polyomavirus T Antigen Induces APOBEC3B Expression Using an LXCXE-  
569 Dependent and TP53-Independent Mechanism. *mBio* **10** (2019).
- 570 9. Verhalen, B., Starrett, G.J., Harris, R.S. & Jiang, M. Functional Upregulation of the DNA  
571 Cytosine Deaminase APOBEC3B by Polyomaviruses. *J Virol* **90**, 6379-6386 (2016).
- 572 10. Llewellyn, M.A. *et al.* Defining the frequency of human papillomavirus and polyomavirus  
573 infection in urothelial bladder tumours. *Sci Rep* **8**, 11290 (2018).
- 574 11. Varley, C. *et al.* Autocrine regulation of human urothelial cell proliferation and migration  
575 during regenerative responses in vitro. *Exp Cell Res* **306**, 216-229 (2005).
- 576 12. Caller, L.G. *et al.* Temporal Proteomic Analysis of BK Polyomavirus Infection Reveals Virus-  
577 Induced G2 Arrest and Highly Effective Evasion of Innate Immune Sensing. *J Virol* **93** (2019).
- 578 13. Li, R. *et al.* Characteristics of polyomavirus BK (BKPyV) infection in primary human urothelial  
579 cells. *Virology* **440**, 41-50 (2013).
- 580 14. Tylden, G.D., Hirsch, H.H. & Rinaldo, C.H. Brincidofovir (CMX001) inhibits BK polyomavirus  
581 replication in primary human urothelial cells. *Antimicrob Agents Chemother* **59**, 3306-3316  
582 (2015).
- 583 15. Cross, W.R., Eardley, I., Leese, H.J. & Southgate, J. A biomimetic tissue from cultured normal  
584 human urothelial cells: analysis of physiological function. *Am J Physiol Renal Physiol* **289**,  
585 F459-468 (2005).

- 586 16. Zareei, N. *et al.* Increasing of the interferon-gamma gene expression during polyomavirus BK  
587 infection in kidney transplant patients. *Microb Pathog* **129**, 187-194 (2019).
- 588 17. Abend, J.R., Low, J.A. & Imperiale, M.J. Inhibitory effect of gamma interferon on BK virus  
589 gene expression and replication. *J Virol* **81**, 272-279 (2007).
- 590 18. Abend, J.R., Joseph, A.E., Das, D., Campbell-Cecen, D.B. & Imperiale, M.J. A truncated T  
591 antigen expressed from an alternatively spliced BK virus early mRNA. *J Gen Virol* **90**, 1238-  
592 1245 (2009).
- 593 19. Solovjeva, L. *et al.* DNA double-strand break repair is impaired in presenescent Syrian  
594 hamster fibroblasts. *BMC Mol Biol* **16**, 18 (2015).
- 595 20. Bracken, A.P. *et al.* EZH2 is downstream of the pRB-E2F pathway, essential for proliferation  
596 and amplified in cancer. *EMBO J* **22**, 5323-5335 (2003).
- 597 21. Fulciniti, M. *et al.* Non-overlapping Control of Transcriptome by Promoter- and Super-  
598 Enhancer-Associated Dependencies in Multiple Myeloma. *Cell Rep* **25**, 3693-3705 e3696  
599 (2018).
- 600 22. Chen, X. *et al.* The forkhead transcription factor FOXM1 controls cell cycle-dependent gene  
601 expression through an atypical chromatin binding mechanism. *Mol Cell Biol* **33**, 227-236  
602 (2013).
- 603 23. Sorensen, C.S. *et al.* The cell-cycle checkpoint kinase Chk1 is required for mammalian  
604 homologous recombination repair. *Nat Cell Biol* **7**, 195-201 (2005).
- 605 24. Erickson, K.D. & Garcea, R.L. Viral replication centers and the DNA damage response in JC  
606 virus-infected cells. *Virology* **528**, 198-206 (2019).
- 607 25. Fischer, M. Census and evaluation of p53 target genes. *Oncogene* **36**, 3943-3956 (2017).
- 608 26. Zapatka, M. *et al.* The landscape of viral associations in human cancers. *Nat Genet* **52**, 320-  
609 330 (2020).
- 610 27. Roelofs, P.A. *et al.* Characterization of the mechanism by which the RB/E2F pathway controls  
611 expression of the cancer genomic DNA deaminase APOBEC3B. *Elife* **9** (2020).
- 612 28. Middlebrooks, C.D. *et al.* Association of germline variants in the APOBEC3 region with cancer  
613 risk and enrichment with APOBEC-signature mutations in tumors. *Nat Genet* **48**, 1330-1338  
614 (2016).
- 615 29. Thielen, B.K. *et al.* Innate immune signaling induces high levels of TC-specific deaminase  
616 activity in primary monocyte-derived cells through expression of APOBEC3A isoforms. *J Biol*  
617 *Chem* **285**, 27753-27766 (2010).
- 618 30. Jalili, P. *et al.* Quantification of ongoing APOBEC3A activity in tumor cells by monitoring RNA  
619 editing at hotspots. *Nat Commun* **11**, 2971 (2020).

- 620 31. Cortez, L.M. *et al.* APOBEC3A is a prominent cytidine deaminase in breast cancer. *PLoS Genet*  
621 **15**, e1008545 (2019).
- 622 32. Periyasamy, M. *et al.* p53 controls expression of the DNA deaminase APOBEC3B to limit its  
623 potential mutagenic activity in cancer cells. *Nucleic Acids Res* **45**, 11056-11069 (2017).
- 624 33. Kim, H.Y., Ahn, B.Y. & Cho, Y. Structural basis for the inactivation of retinoblastoma tumor  
625 suppressor by SV40 large T antigen. *EMBO J* **20**, 295-304 (2001).
- 626 34. Engels, E.A. *et al.* Spectrum of cancer risk among US solid organ transplant recipients. *Jama*  
627 **306**, 1891-1901 (2011).
- 628 35. Grulich, A.E., van Leeuwen, M.T., Falster, M.O. & Vajdic, C.M. Incidence of cancers in people  
629 with HIV/AIDS compared with immunosuppressed transplant recipients: a meta-analysis.  
630 *Lancet* **370**, 59-67 (2007).
- 631 36. Rogers, R., Gohh, R. & Noska, A. Urothelial cell carcinoma after BK polyomavirus infection in  
632 kidney transplant recipients: A cohort study of veterans. *Transpl Infect Dis* **19** (2017).
- 633 37. Yu, J. *et al.* Incidences and oncological outcomes of urothelial carcinoma in kidney transplant  
634 recipients. *Cancer Manag Res* **11**, 157-166 (2019).
- 635 38. Kesharwani, V. & Tarang, S. An immunoinformatic approach to universal therapeutic vaccine  
636 design against BK virus. *Vaccine* **37**, 3457-3463 (2019).
- 637 39. Kataja, V. *et al.* Risk factors associated with cervical human papillomavirus infections: a case-  
638 control study. *Am J Epidemiol* **138**, 735-745 (1993).
- 639 40. Gupta, G. *et al.* Treatment for presumed BK polyomavirus nephropathy and risk of urinary  
640 tract cancers among kidney transplant recipients in the United States. *Am J Transplant* **18**,  
641 245-252 (2018).
- 642 41. Linke, S.P. *et al.* p53 interacts with hRAD51 and hRAD54, and directly modulates  
643 homologous recombination. *Cancer Res* **63**, 2596-2605 (2003).
- 644 42. Southgate, J., Hutton, K.A., Thomas, D.F. & Trejdosiewicz, L.K. Normal human urothelial cells  
645 in vitro: proliferation and induction of stratification. *Lab Invest* **71**, 583-594 (1994).
- 646 43. Panou, M.M. *et al.* Agnoprotein Is an Essential Egress Factor during BK Polyomavirus  
647 Infection. *Int J Mol Sci* **19** (2018).
- 648 44. An, P., Saenz Robles, M.T., Duray, A.M., Cantalupo, P.G. & Pipas, J.M. Human polyomavirus  
649 BKV infection of endothelial cells results in interferon pathway induction and persistence.  
650 *PLoS Pathog* **15**, e1007505 (2019).
- 651 45. Johannessen, M., Myhre, M.R., Dragset, M., Tummler, C. & Moens, U. Phosphorylation of  
652 human polyomavirus BK agnoprotein at Ser-11 is mediated by PKC and has an important  
653 regulative function. *Virology* **379**, 97-109 (2008).

- 654 46. Bray, N.L., Pimentel, H., Melsted, P. & Pachter, L. Near-optimal probabilistic RNA-seq  
655 quantification. *Nat Biotechnol* **34**, 525-527 (2016).
- 656 47. Kim, D., Paggi, J.M., Park, C., Bennett, C. & Salzberg, S.L. Graph-based genome alignment and  
657 genotyping with HISAT2 and HISAT-genotype. *Nat Biotechnol* **37**, 907-915 (2019).
- 658 48. McKenna, A. *et al.* The Genome Analysis Toolkit: a MapReduce framework for analyzing  
659 next-generation DNA sequencing data. *Genome Res* **20**, 1297-1303 (2010).
- 660 49. Broad, I. Picard Toolkit. <http://broadinstitute.github.io/picard/> (2019).
- 661 50. Li, H. *et al.* The Sequence Alignment/Map format and SAMtools. *Bioinformatics* **25**, 2078-  
662 2079 (2009).
- 663 51. Danecek, P. *et al.* The variant call format and VCFtools. *Bioinformatics* **27**, 2156-2158 (2011).
- 664 52. Pimentel, H., Bray, N.L., Puente, S., Melsted, P. & Pachter, L. Differential analysis of RNA-seq  
665 incorporating quantification uncertainty. *Nat Methods* **14**, 687-690 (2017).
- 666 53. Xiao, Y. *et al.* A novel significance score for gene selection and ranking. *Bioinformatics* **30**,  
667 801-807 (2014).
- 668 54. Brown, W.L. *et al.* A Rabbit Monoclonal Antibody against the Antiviral and Cancer Genomic  
669 DNA Mutating Enzyme APOBEC3B. *Antibodies (Basel)* **8** (2019).
- 670
